# Supplementary material for: Advances in AI for Protein Structure Prediction: Implications for Cancer Drug Discovery and Development
Source: MDPI journal article supplement (doi:10.3390/biom14030339), 2024-03-12
Supplement: s1 [file s1]

**Scheme 1.** Comparison of algorithms among AF2, ESM2 and OpenFold.

|                          | <b>AlphaFold2</b> | <b>ESM2</b> | <b>OpenFold</b> |
|--------------------------|-------------------|-------------|-----------------|
| Model Structure          | b+c+d             | a+e+f       | b+c+d           |
| Parameters               | 21 million        | 15 billion  | 93 million      |
| Framework implementation | TensorFlow, Jax   | PyTorch     | PyTorch         |
| Uses MSA                 | ☑                 |             | ☑               |
| Uses Structure templates | ☑                 |             | ☑               |
| Uses sequence            | ☑                 | ☑           | ☑               |

- a. Sequence input.
- b. Three channel input.
- c. Transformer based prediction module.
- d. 3D structure equivalent module.
- e. Transformer based prediction model without using MSA.
- f. 3D equivalent structure module without using MSA.
